# Supplementary material
Source: PubMed Central journal article supplement (PMC8017913)
Supplement: mmc1.pdf [file mmc1.pdf]

**Supplementary Table 1.** Baseline characteristics of healthy and COVID-19 subjects. Comparisons are performed by two-tailed non-parametric Mann-Whitney U-test. Data are expressed as mean  $\pm$  S.E.M.. *NS*, not significant.

| <b>Baseline characteristics</b>      | <b>Healthy subjects</b> | <b>COVID subjects</b>                                                           | <b><i>P</i> value</b> |
|--------------------------------------|-------------------------|---------------------------------------------------------------------------------|-----------------------|
| Number of subjects                   | 61                      | 233                                                                             | -                     |
| Age (years)                          | 57 $\pm$ 7              | 60 $\pm$ 7                                                                      | <i>NS</i>             |
| Gender (M/F)                         | 37/24                   | 167/66                                                                          | -                     |
| Body Mass Index (Kg/m <sup>2</sup> ) | 27 $\pm$ 2              | 30 $\pm$ 6                                                                      | <i>NS</i>             |
| SARS-CoV-2 N antigen (pg/mL)         | 0.04 $\pm$ 0.004        | 133 $\pm$ 32.73                                                                 | **** <i>P</i> <0.0001 |
| CRP (mg/L)                           | -                       | 9.22 $\pm$ 0.62                                                                 | -                     |
| Hospitalized in                      | -                       | COVID-19 First Aid (n=95)<br>COVID-19 Ward (n=96)<br>Intensive Care Unit (n=42) | -                     |

**Supplementary Table 2.** SARS-CoV-2 N-antigen levels in COVID-19 patients stratified on the basis of hospital admission unit. Comparisons are performed by two-tailed non-parametric Mann-Whitney U-test. Data are expressed as mean  $\pm$  S.E.M..

| Hospital Admission Unit   | SARS-CoV-2 antigen (pg/mL) | <i>P</i> value                                                   |
|---------------------------|----------------------------|------------------------------------------------------------------|
| COVID-19 First Aid        | 123 $\pm$ 248.1            | *** <i>P</i> <0.001 vs COVID-19 Ward<br>** <i>P</i> <0.01 vs ICU |
| COVID-19 Ward             | 107.2 $\pm$ 53.72          | *** <i>P</i> <0.001 vs COVID-19 First Aid                        |
| Intensive Care Unit (ICU) | 214.4 $\pm$ 121.5          | ** <i>P</i> <0.01 vs COVID-19 First Aid                          |

**Supplementary Table 3.** SARS-CoV-2 N-antigen levels in COVID-19 patients stratified on the basis of grade of disease, as CRP concentrations. Comparisons are performed by two-tailed non-parametric Mann-Whitney U-test. Data are expressed as mean  $\pm$  S.E.M..

| Grade of disease | CRP           | SARS-CoV-2 antigen (pg/mL) | <i>P</i> value                                                       |
|------------------|---------------|----------------------------|----------------------------------------------------------------------|
| Mild             | $\leq 5$ mg/L | 24.22 $\pm$ 9.07           | **** <i>P</i> <0.0001 vs Moderate<br>**** <i>P</i> <0.0001 vs Severe |
| Moderate         | 6-20 mg/L     | 184.3 $\pm$ 59.8           | **** <i>P</i> <0.0001 vs Mild                                        |
| Severe           | 21-80 mg/L    | 420.2 $\pm$ 174.9          | **** <i>P</i> <0.0001 vs Mild                                        |
